# Supplementary material for: Anionic lanthanide metal–organic frameworks with magnetic, fluorescence, and proton conductivity properties and selective adsorption of a cationic dye
Source: Royal Society of Chemistry journal article supplement (doi:10.1039/d2dt02347d), 2022-01-01
Supplement: d2dt02347d1.pdf [file d2dt02347d1.pdf]

***Electronic Supplementary Information (ESI)***

**Anionic lanthanide metal-organic frameworks with magnetic, fluorescence, and proton conductivity properties and selective adsorption of a cationic dye**

Xiao-Nuan Zhang, Bo-Chen Chen, Jia-Li Zhang, Jia-Lin Zhang, Sui-Jun Liu\* and He-Rui Wen\*

School of Chemistry and Chemical Engineering, Jiangxi Provincial Key Laboratory of Functional Molecular Materials Chemistry, Jiangxi University of Science and Technology, Ganzhou 341000, Jiangxi Province, P.R. China.

E-mail: wenherui63@163.com (He-Rui Wen); sjliu@jxust.edu.cn (Sui-Jun Liu)

**Table S1.** Selected bond lengths (Å) and angles (deg) for **1<sup>a</sup>**.

|                                          |            |                                         |            |
|------------------------------------------|------------|-----------------------------------------|------------|
| Gd1—O1                                   | 2.301(4)   | Gd1—O5 <sup>iii</sup>                   | 2.456(5)   |
| Gd1—O2 <sup>i</sup>                      | 2.434(5)   | Gd1—O6 <sup>i</sup>                     | 2.524(5)   |
| Gd1—O3 <sup>ii</sup>                     | 2.311(4)   | Gd1—O7 <sup>iv</sup>                    | 2.371(5)   |
| Gd1—O4 <sup>iii</sup>                    | 2.452(4)   | Gd1—O11 <sup>v</sup>                    | 2.374(5)   |
| O1—Gd1—O2 <sup>i</sup>                   | 76.9(2)    | O2 <sup>i</sup> —Gd1—O4 <sup>iii</sup>  | 98.6(2)    |
| O1—Gd1—O3 <sup>ii</sup>                  | 78.6(2)    | O2 <sup>i</sup> —Gd1—O5 <sup>iii</sup>  | 71.1(2)    |
| O1—Gd1—O4 <sup>iii</sup>                 | 132.43(19) | O2 <sup>i</sup> —Gd1—O6 <sup>i</sup>    | 52.2(2)    |
| O1—Gd1—O5 <sup>iii</sup>                 | 82.15(18)  | O3 <sup>ii</sup> —Gd1—O2 <sup>i</sup>   | 84.8(2)    |
| O1—Gd1—O6 <sup>i</sup>                   | 126.10(18) | O3 <sup>ii</sup> —Gd1—O4 <sup>iii</sup> | 148.9(2)   |
| O1—Gd1—O7 <sup>iv</sup>                  | 79.78(18)  | O3 <sup>ii</sup> —Gd1—O5 <sup>iii</sup> | 152.0(2)   |
| O1—Gd1—O11 <sup>v</sup>                  | 135.34(15) | O3 <sup>ii</sup> —Gd1—O6 <sup>i</sup>   | 80.21(17)  |
| O4 <sup>iii</sup> —Gd1—O5 <sup>iii</sup> | 52.7(2)    | O3 <sup>ii</sup> —Gd1—O7 <sup>iv</sup>  | 117.21(16) |
| O4 <sup>iii</sup> —Gd1—O6 <sup>i</sup>   | 77.81(17)  | O5 <sup>iii</sup> —Gd1—O6 <sup>i</sup>  | 95.3(2)    |
| O7 <sup>iv</sup> —Gd1—O2 <sup>i</sup>    | 143.7(2)   | O11 <sup>v</sup> —Gd1—O2 <sup>i</sup>   | 137.64(19) |
| O7 <sup>iv</sup> —Gd1—O4 <sup>iii</sup>  | 77.43(17)  | O11 <sup>v</sup> —Gd1—O4 <sup>iii</sup> | 78.52(17)  |
| O7 <sup>iv</sup> —Gd1—O5 <sup>iii</sup>  | 78.6(2)    | O11 <sup>v</sup> —Gd1—O5 <sup>iii</sup> | 129.2(2)   |
| O7 <sup>iv</sup> —Gd1—O6 <sup>i</sup>    | 152.73(19) | O11 <sup>v</sup> —Gd1—O6 <sup>i</sup>   | 86.46(17)  |

<sup>a</sup>Symmetry codes: (i)  $-x+y, -x+1, z-1/3$ ; (ii)  $-x+1, -x+y, -z+4/3$ ; (iii)  $y-1, x, -z+1$ ; (iv)  $-x, -x+y, -z+4/3$ ; (v)  $x-1, y-1, z$ .

**Table S2.** Selected bond lengths (Å) and angles (deg) for **2<sup>b</sup>**.

|                                          |            |                                          |            |
|------------------------------------------|------------|------------------------------------------|------------|
| Dy01—O1 <sup>i</sup>                     | 2.275(4)   | Dy01—O4 <sup>iv</sup>                    | 2.286(4)   |
| Dy01—O8 <sup>ii</sup>                    | 2.510(5)   | Dy01—O5 <sup>v</sup>                     | 2.443(5)   |
| Dy01—O2 <sup>iii</sup>                   | 2.350(5)   | Dy01—O6 <sup>v</sup>                     | 2.427(4)   |
| Dy01—O3                                  | 2.349(4)   | Dy01—O7 <sup>ii</sup>                    | 2.400(5)   |
| O1 <sup>i</sup> —Dy01—O2 <sup>iii</sup>  | 80.11(18)  | O3—Dy01—O2 <sup>iii</sup>                | 77.14(19)  |
| O1 <sup>i</sup> —Dy01—O3                 | 135.12(15) | O3—Dy01—O5 <sup>v</sup>                  | 128.93(19) |
| O1 <sup>i</sup> —Dy01—O4 <sup>iv</sup>   | 79.07(19)  | O3—Dy01—O6 <sup>v</sup>                  | 78.44(17)  |
| O1 <sup>i</sup> —Dy01—O5 <sup>v</sup>    | 81.85(18)  | O3—Dy01—O7 <sup>ii</sup>                 | 138.05(18) |
| O1 <sup>i</sup> —Dy01—O6 <sup>v</sup>    | 132.92(19) | O3—Dy01—O8 <sup>ii</sup>                 | 86.65(17)  |
| O1 <sup>i</sup> —Dy01—O7 <sup>ii</sup>   | 76.88(18)  | O4 <sup>iv</sup> —Dy01—O2 <sup>iii</sup> | 118.29(16) |
| O1 <sup>i</sup> —Dy01—O8 <sup>ii</sup>   | 126.28(17) | O4 <sup>iv</sup> —Dy01—O3                | 78.5(2)    |
| O2 <sup>iii</sup> —Dy01—O5 <sup>v</sup>  | 77.6(2)    | O4 <sup>iv</sup> —Dy01—O5 <sup>v</sup>   | 152.2(2)   |
| O2 <sup>iii</sup> —Dy01—O6 <sup>v</sup>  | 77.68(17)  | O4 <sup>iv</sup> —Dy01—O6 <sup>v</sup>   | 147.8(2)   |
| O2 <sup>iii</sup> —Dy01—O7 <sup>ii</sup> | 143.7(2)   | O4 <sup>iv</sup> —Dy01—O7 <sup>ii</sup>  | 84.4(2)    |
| O2 <sup>iii</sup> —Dy01—O8 <sup>ii</sup> | 152.17(18) | O4 <sup>iv</sup> —Dy01—O8 <sup>ii</sup>  | 79.48(18)  |
| O5 <sup>v</sup> —Dy01—O8 <sup>ii</sup>   | 96.0(2)    | O7 <sup>ii</sup> —Dy01—O5 <sup>v</sup>   | 71.6(2)    |
| O7 <sup>ii</sup> —Dy01—O8 <sup>ii</sup>  | 52.44(19)  | O7 <sup>ii</sup> —Dy01—O6 <sup>v</sup>   | 98.1(2)    |

<sup>b</sup>Symmetry codes: (i)  $x, y+1, z$ ; (ii)  $-x+y+1, -x+2, z-1/3$ ; (iii)  $x-y, -y+1, -z+2/3$ ; (iv)  $x-y+1, -y+2, -z+2/3$ ; (v)  $-x+1, -x+y+1, -z+1/3$ .

**Table S3.** RhB adsorption capacity and adsorption time of MOFs.

| Dye | MOFs                                        | Removalrate (mg/g) | Time (min) | Ref.      |
|-----|---------------------------------------------|--------------------|------------|-----------|
| RhB | Ln-MOF 2                                    | 79.42              | 40         | this work |
|     | MIL-125(Ti)                                 | 59.92              | 180        | S1        |
|     | Zn-MOF                                      | 3.75               | 60         | S2        |
|     | POM@UiO-66                                  | 222.6              | 120        | S3        |
|     | USTC-1                                      | 13.4               | 240        | S4        |
|     | MIL-68(Al)                                  | 1111.11            | 10         | S5        |
|     | MgFe <sub>2</sub> O <sub>4</sub> @MOF       | 219.78             | 5          | S6        |
|     | Fe <sub>3</sub> O <sub>4</sub> /MIL-100(Fe) | 28.36              | 90         | S7        |

**Table S4.** Maximum  $\sigma$  values of Ln-MOF 1 and RhB@Ln-MOF 1 compared with the selected Ln-MOFs.

| MOFs                                                                                                                                                           | $\sigma$ [S·cm <sup>-1</sup> ] | conditions    | $E_a$ (eV) | Ref.      |
|----------------------------------------------------------------------------------------------------------------------------------------------------------------|--------------------------------|---------------|------------|-----------|
| H[(N(Me) <sub>4</sub> ) <sub>2</sub> ][Gd <sub>3</sub> (NIPA) <sub>6</sub> ] $\cdot$ 3H <sub>2</sub> O                                                         | $7.17 \times 10^{-2}$          | 75 °C-98% RH  | 0.13       | S8        |
| {[Er <sub>4</sub> (OH) <sub>4</sub> (L) <sub>2</sub> (H <sub>2</sub> O) <sub>8</sub> ] $\cdot$ 4.6H <sub>2</sub> O $\cdot$ 1.4CH <sub>3</sub> CN} <sub>n</sub> | $6.59 \times 10^{-3}$          | 80 °C-95% RH  | 0.32       | S9        |
| {[Ho <sub>4</sub> (OH) <sub>4</sub> (L) <sub>2</sub> (H <sub>2</sub> O) <sub>8</sub> ] $\cdot$ 4.6H <sub>2</sub> O $\cdot$ 1.4CH <sub>3</sub> CN} <sub>n</sub> | $4.56 \times 10^{-3}$          | 80 °C-95% RH  | 0.38       | S9        |
| {[Dy(DMTP-DC) <sub>1.5</sub> (H <sub>2</sub> O) <sub>3</sub> ] $\cdot$ H <sub>2</sub> O} <sub>n</sub>                                                          | $2.67 \times 10^{-4}$          | 55 °C-100% RH | 0.20       | S10       |
| {[Nd <sub>2</sub> (HMIDC) <sub>2</sub> ( $\mu$ -C <sub>2</sub> O <sub>4</sub> )(H <sub>2</sub> O) <sub>3</sub> ] $\cdot$ 4H <sub>2</sub> O} <sub>n</sub>       | $2.25 \times 10^{-4}$          | 100°C-98% RH  | 0.71       | S11       |
| {[Gd(DMTP-DC) <sub>1.5</sub> (H <sub>2</sub> O) <sub>3</sub> ] $\cdot$ H <sub>2</sub> O} <sub>n</sub>                                                          | $1.62 \times 10^{-4}$          | 55°C-100% RH  | 0.27       | S10       |
| Ln-MOF 1                                                                                                                                                       | $1.02 \times 10^{-4}$          | 50 °C -90% RH | 0.34       | this work |
| JXNU-8(Eu)                                                                                                                                                     | $2.28 \times 10^{-5}$          | 80 °C-98% RH  | 0.18       | S12       |
| {[Gd <sub>4</sub> (OH) <sub>4</sub> (L) <sub>2</sub> (H <sub>2</sub> O) <sub>8</sub> ] $\cdot$ 4.6H <sub>2</sub> O $\cdot$ 1.4CH <sub>3</sub> CN} <sub>n</sub> | $2.02 \times 10^{-6}$          | 80 °C-95% RH  | 0.27       | S9        |
| RhB@Ln-MOF 1                                                                                                                                                   | $7.40 \times 10^{-8}$          | 50 °C -90% RH | 0.45       | this work |

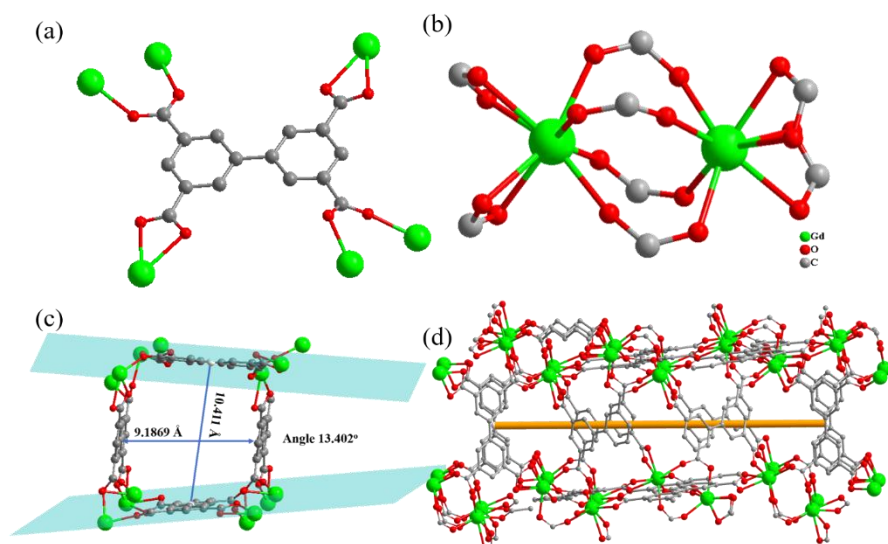

**Fig. S1** (a) the way a metal is connected to a ligand; (b) Secondary building unit; (c) the dihedral angles and distances between ligands; (d) the 1D channel in Ln-MOF 1.

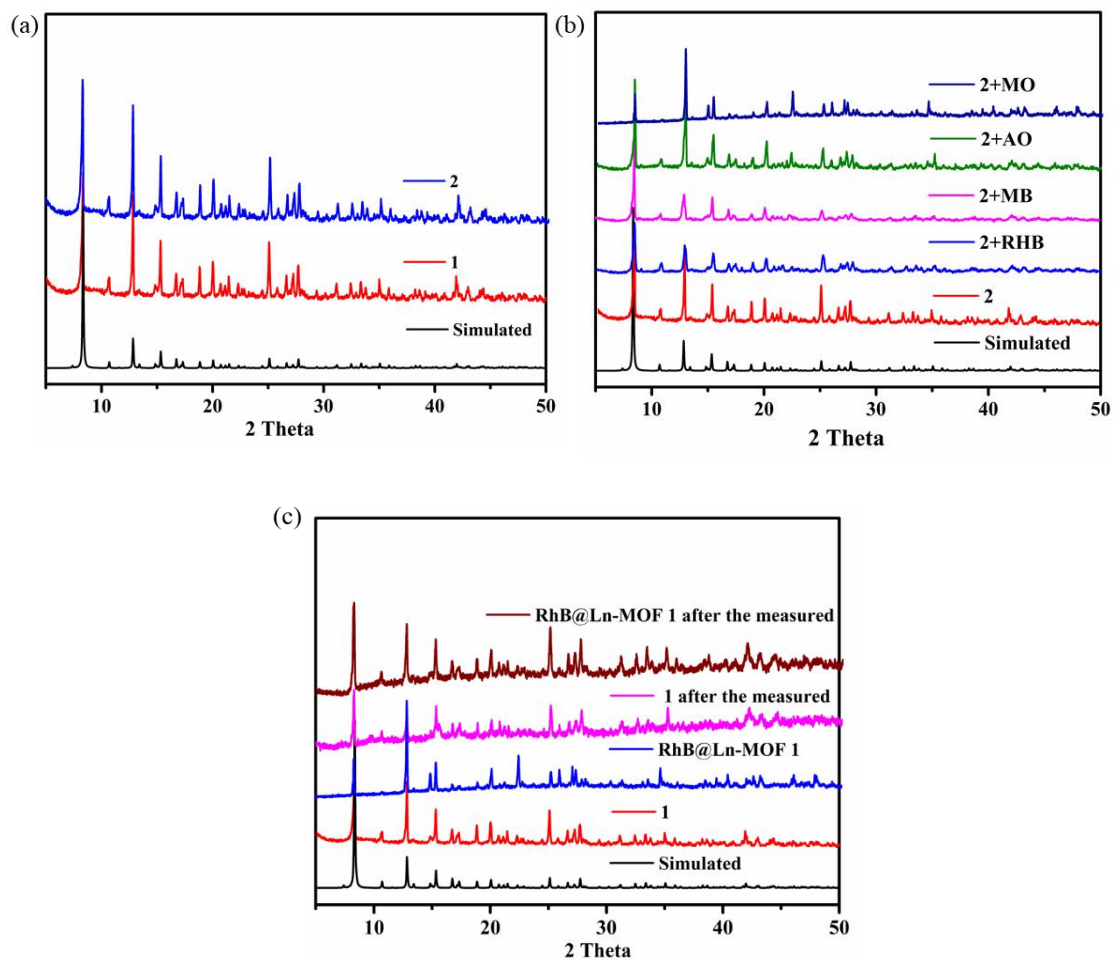

**Fig. S2** The PXRD patterns of **1** and **2** (a), **2** after the adsorption of dyes (b), and RhB@Ln-MOF **1** and the sample after the proton conduction (c).

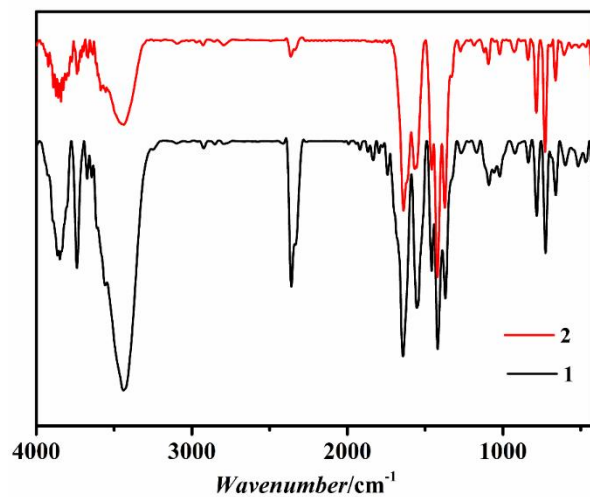

Fig. S3 The IR spectra of Ln-MOFs 1 and 2.

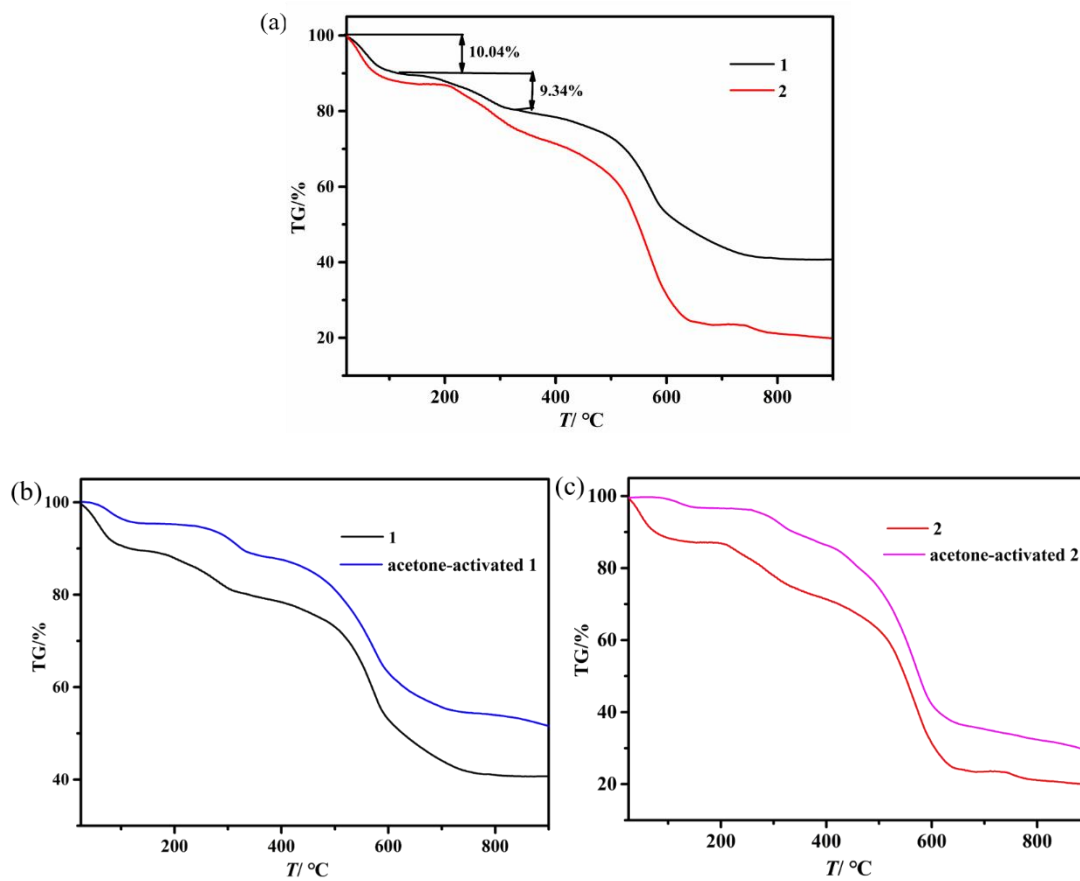

Fig. S4 The TG curves of Ln-MOFs 1 and 2 (a), and acetone-activated 1 (b) and 2 (c).

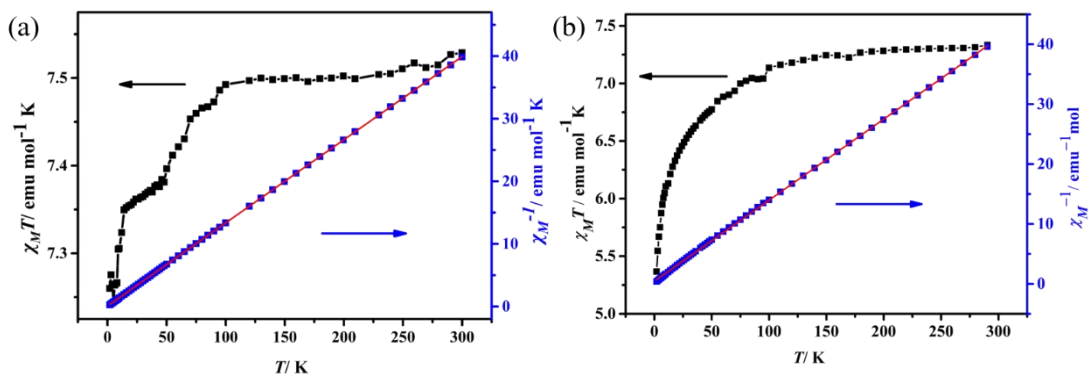

Fig. S5 Plots of  $\chi_M T$  vs  $T$  and  $\chi_M^{-1}$  vs  $T$  of Ln-MOFs 1 (a) and 2 (b). Red lines for the Curie-Weiss fitting.

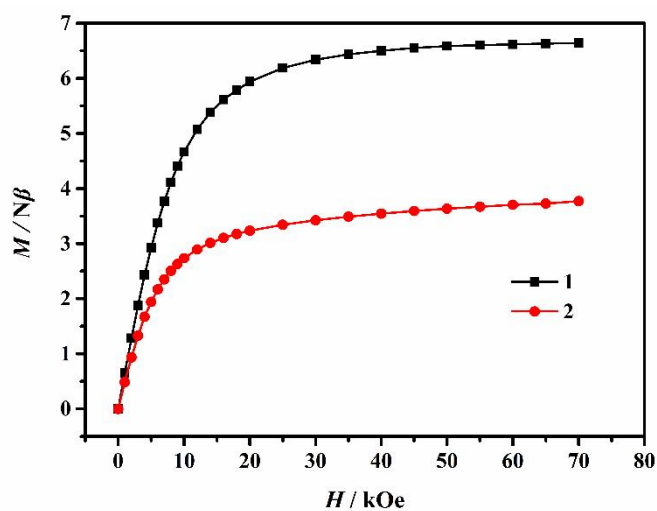

Fig. S6 Field dependence of the magnetizations of 1 and 2 at 2 K.

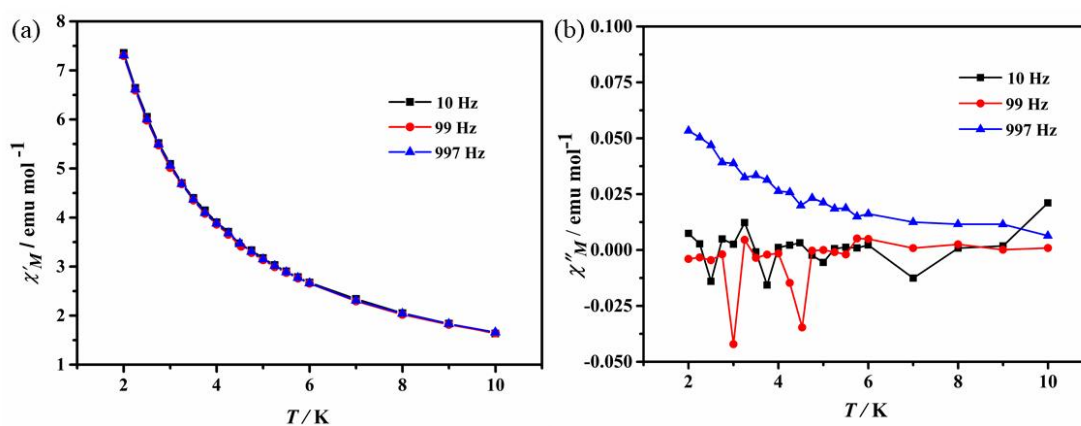

Fig. S7 Frequency dependence of the in-phase ( $\chi'$ ) and out-of-phase ( $\chi''$ ) ac susceptibility signals for 2 under zero-dc field.

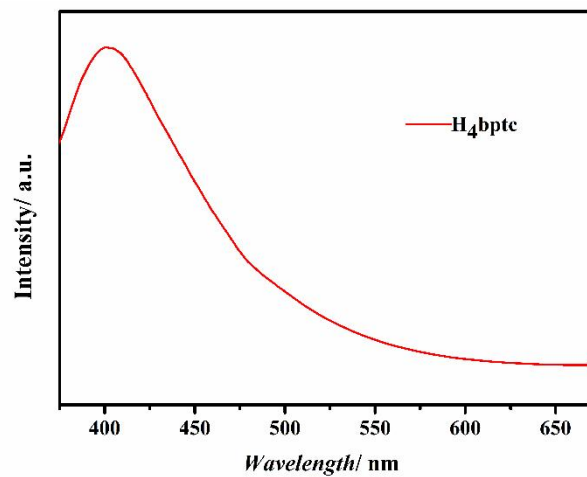

Fig. S8 The emission spectrum of H<sub>4</sub>bptc ( $\lambda_{\text{ex}} = 354$  nm).

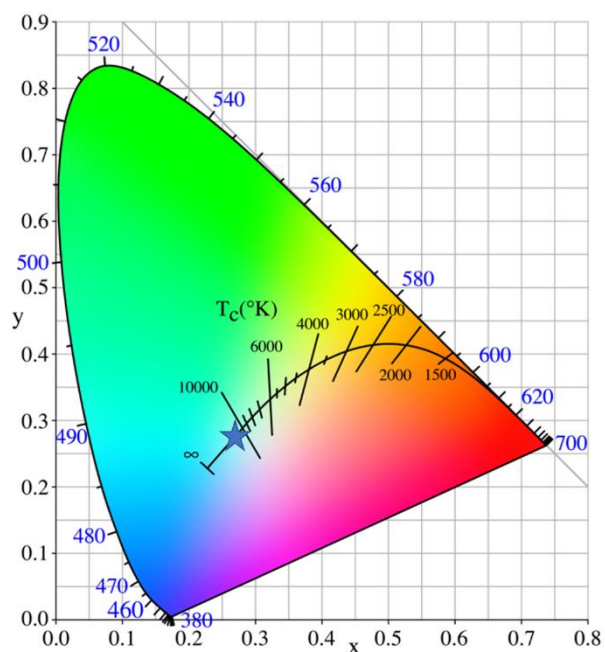

Fig. S9 CIE chromaticity diagram showing the color coordinates of Ln-MOF 2 under the excitation of 328 nm.

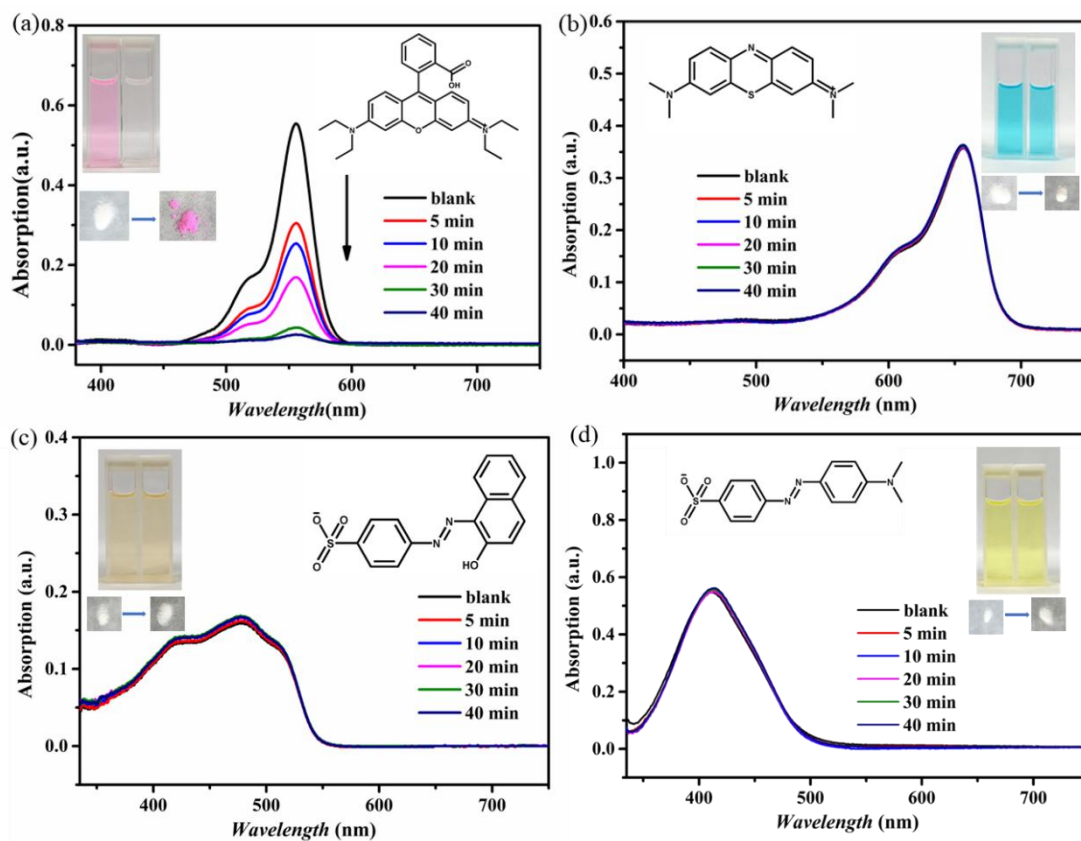

**Fig. S10** UV-vis absorption spectra of **1** adsorbed RhB (a), MB (b), AO (c) and MO (d) in acetone solutions during the adsorption process.

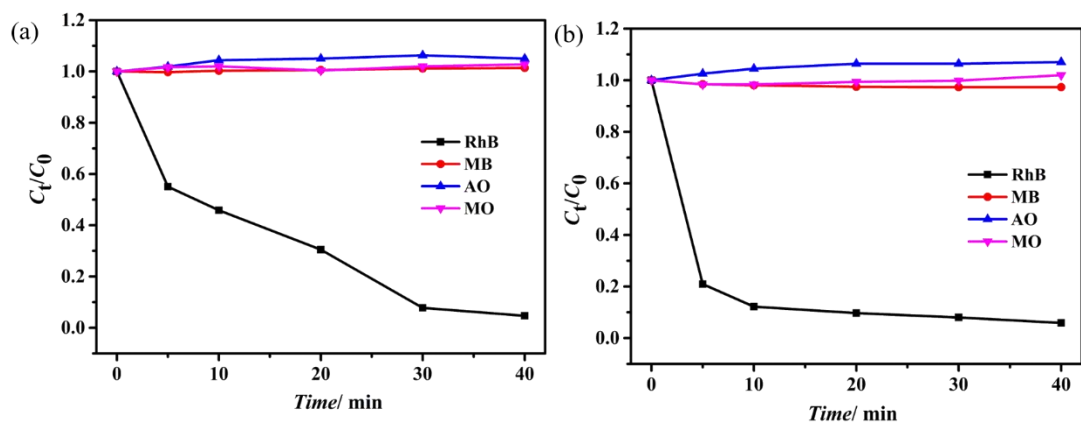

**Fig. S11** Corresponding plots of  $C_t/C_0$  of dyes versus time during the adsorption of **1** (a) and **2** (b).



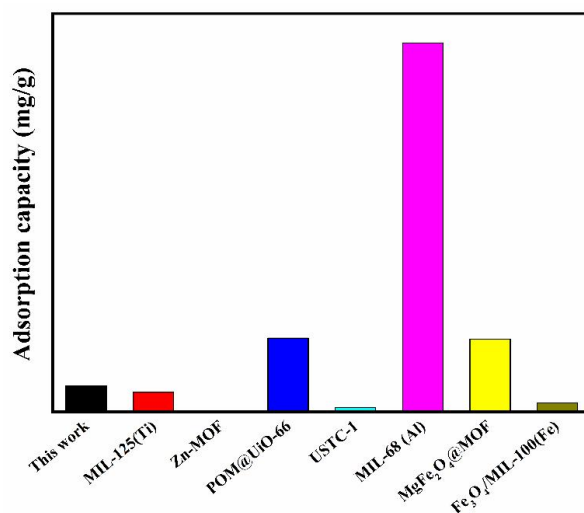

Fig. S12 The RhB adsorption capacity of different MOFs.

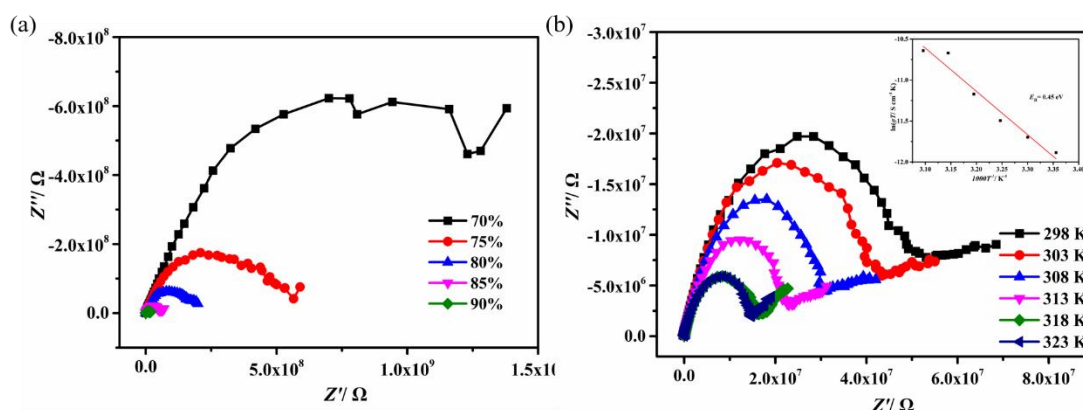

Fig. S13 (a) Nyquist plots for RhB@Ln-MOF **1** at different RHs and  $T = 323$  K. (b) Nyquist plots for RhB@Ln-MOF **1** at different temperatures and 90% RH; Arrhenius plots of the conductivity of RhB@Ln-MOF **1** (inset).

## References

- S1 H. Guo, F. Lin, J. Chen, F. Li and W. Weng, *Appl. Organomet. Chem.*, 2015, **29**, 12–19.
- S2 J. Zhang, F. Li and Q. Sun, *Appl. Surf. Sci. J.*, 2018, **440**, 1219–1226.
- S3 L. Zeng, L. Xiao, Y. Long and X. J. Shi, *Colloid Interface Sci.*, 2018, **516**, 274–283.
- S4 B. Li, W. Jiang, Y. Xu, Z. Xu, Q. Yan and G. Yong, *Dyes Pigments*, 2020, **174**, 108017.
- S5 M. S. Tehrani and R. Zare-dorabei, *RSC Adv.*, 2016, **6**, 27416–27425.
- S6 H. Tian, J. Peng, T. Lv, C. Sun and H. J. He, *Solid State Chem.*, 2018, **257**, 40–48.
- S7 H. Liu, X. Ren and L. Chen, *J. Ind. Eng. Chem.*, 2016, **34**, 278–285.
- S8 X. S. Xing, Z. H. Fu, N. N. Zhang, X. Q. Yu, M. S. Wang and G. C. Guo, *Chem. Commun.*, 2019, **55**, 1241–1244.
- S9 S. P. Bera, A. Mondal, S. Roy, B. Dey, A. Santra and S. Konar, *Dalton Trans.*, 2018, **47**, 15405–15415.
- S10 J. J. Hu, Y. G. Li, H. R. Wen, S. J. Liu, Y. Peng and C. M. Liu, *Inorg. Chem.*, 2022, **61**, 6819–6828.
- S11 R. L. Liu, Y. H. Yu, H. W. Wang, Y. Y. Liu and G. Li, *Inorg. Chem.*, 2021, **60**, 10808–10818.
- S12 M. Y. Xu, Y. L. Wang, Q. Y. Liu, Z. T. Lin and Q. Y. Liu, *Inorg. Chem.*, 2020, **59**, 7265–7273.
